# Supplementary material for: Genomic insights and phylogenetic relationships of a novel alasvirus from Recilia dorsalis
Source: Research Square preprint supplement (doi:10.21203/rs.3.rs-6848948/v1), 2025-06-13
Supplement: Supplementary file 1 [file 43fdd55037be4766116b87ee.docx]

| Primer name | Primer sequence (5'-3') | Position |
| --- | --- | --- |
| RdAV-1F | TCAGCTTTACTAGCACCCTTT | 196-217 |
| RdAV-1R | CTAGCTCACCGAACAATGACAAT | 2055-2077 |
| RdAV-2F | GAGTCTTGCATCGATACATTCT | 1739-1760 |
| RdAV-2R | GGATTCACTTTGGTTAATGGGAAATGGG | 3980-4007 |
| RdAV-3F | GGAATCATTGACAGAGAAGGT | 3724-3744 |
| RdAV-3R | GATGCTCTGATGGAACCTATGAC | 5638-5660 |
| RdAV-4F | GAAGTTACCCCAATGCACAA | 5461-5480 |
| RdAV-4R | GAATTTCCCCTCTGATTTTGGCG | 9541-9563 |
| RdAV-5F | GACCAAAGTGAAAGTGTTGCAACA | 9353-9376 |
| RdAV-5R | GAGCTAAGTACTCCGAGGCT | 13475-13494 |
| RdAV-51 | TGCTTCCGCTGACAAAATAG | 371-390 |
| RdAV-52 | GGAGGTTTTGCTACAATGG | 263-281 |
| RdAV-31 | ATAAGCGGGAGTCAAAACAG | 13651-13670 |
| RdAV-32 | CGTATACACTCTATATTGGATGAATC | 13712-13737 |

Supplementary table 1 List of oligonucleotide primers used in this study
